# Supplementary material for: Dp44mT targets the AKT, TGF-β and ERK pathways via the metastasis suppressor NDRG1 in normal prostate epithelial cells and prostate cancer cells
Source: PubMed Central journal article supplement — Br J Cancer. 2013 Jan 3;108(2):409–19. doi: 10.1038/bjc.2012.582 (PMC3566801; doi:10.1038/bjc.2012.582), 2013-01-03
Supplement: bjc2012582x1.pdf [file bjc2012582x1.pdf]

**A**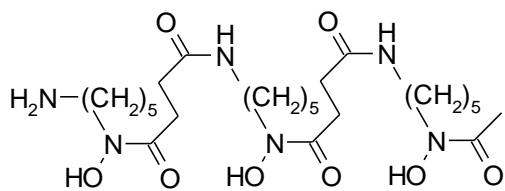

DFO

**B**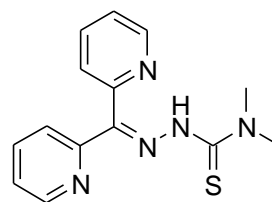

Dp44mT

**Supplementary Figure 1**

### A PrEC

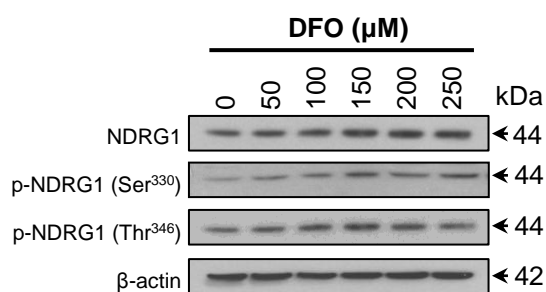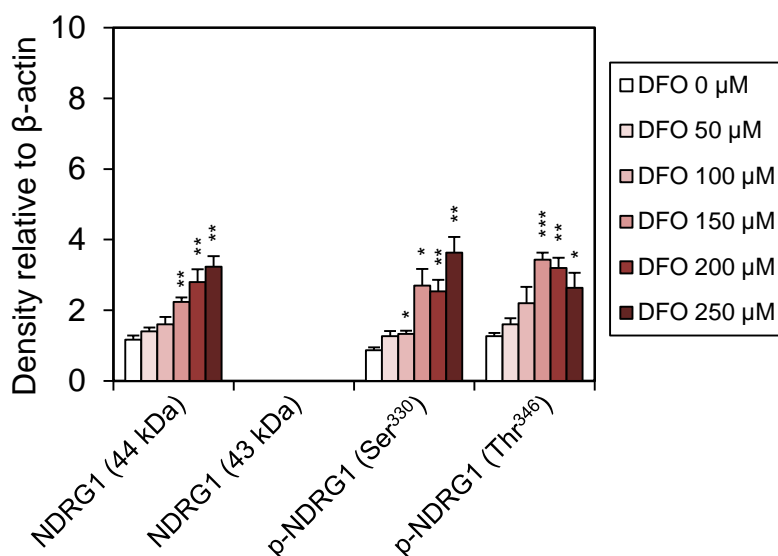

### B PC-3

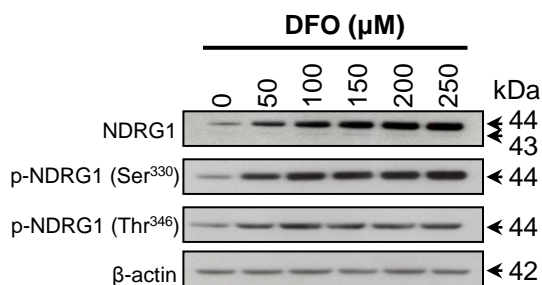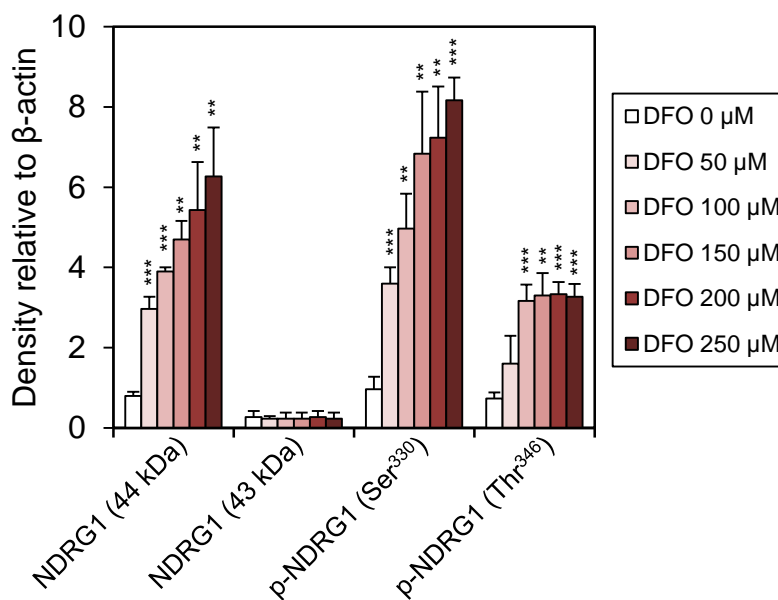

### C DU145

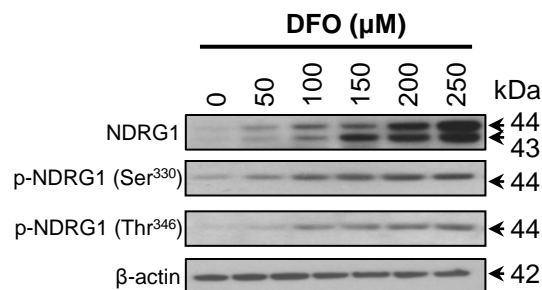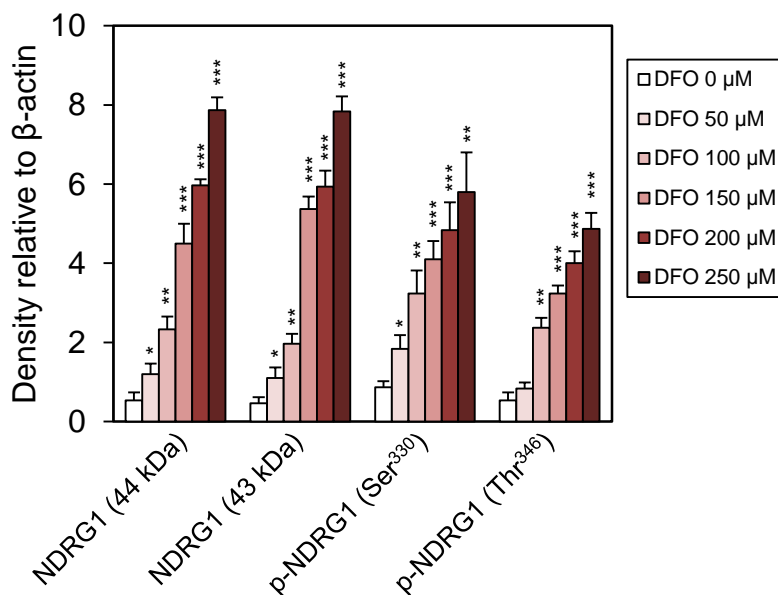

### A PrEC

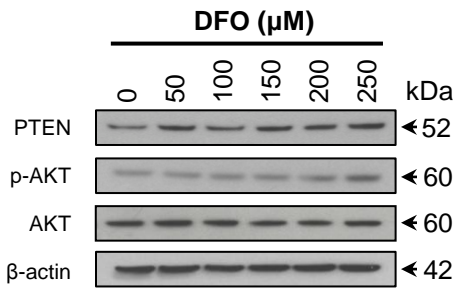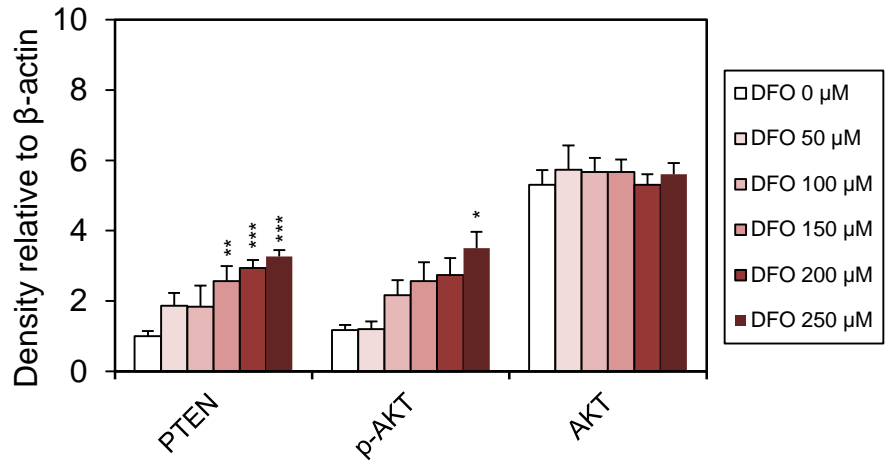

### B PC-3

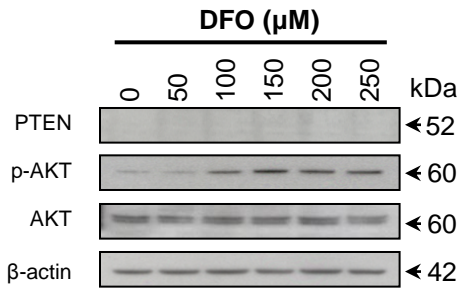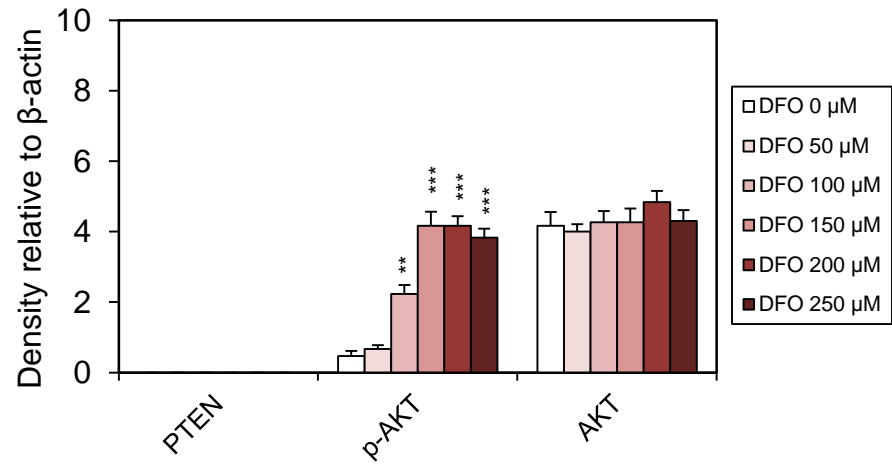

### C DU145

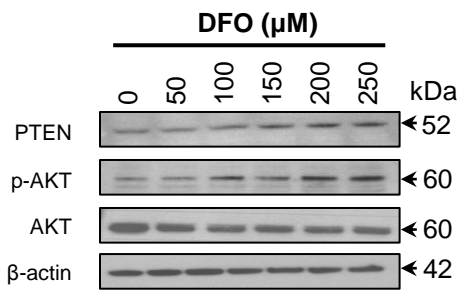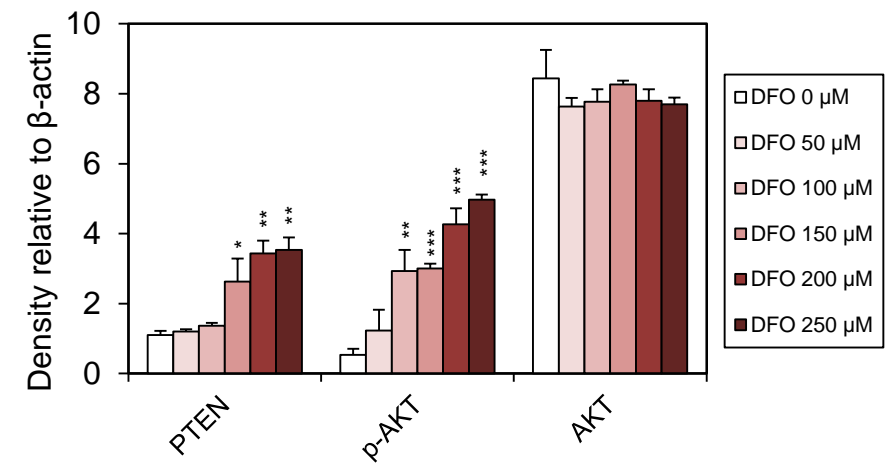

Supplementary Figure 3

**A****PrEC**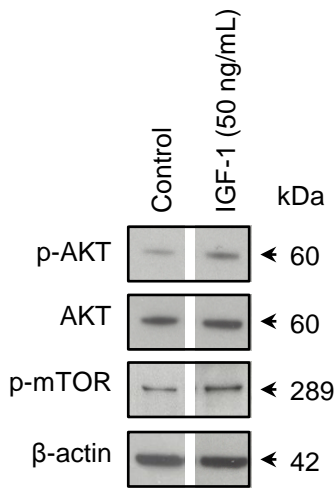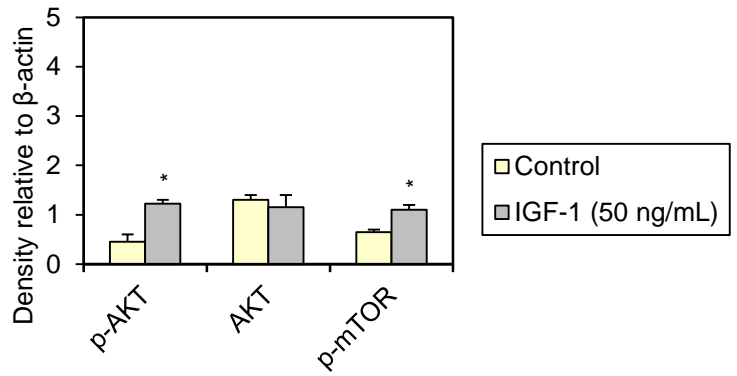**B****PC3**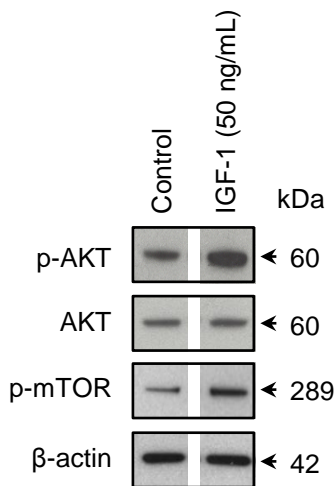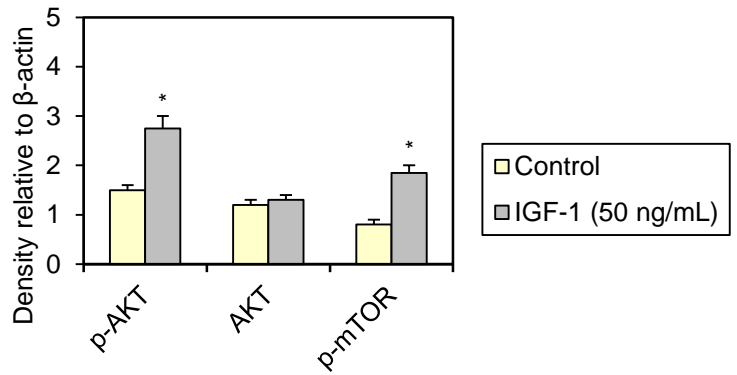**C****DU145**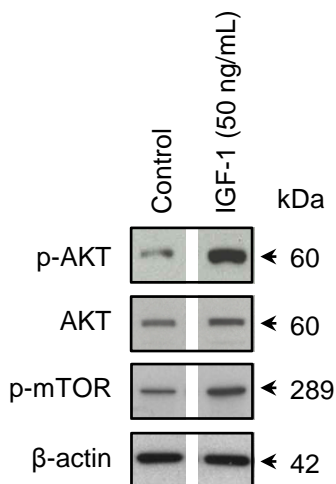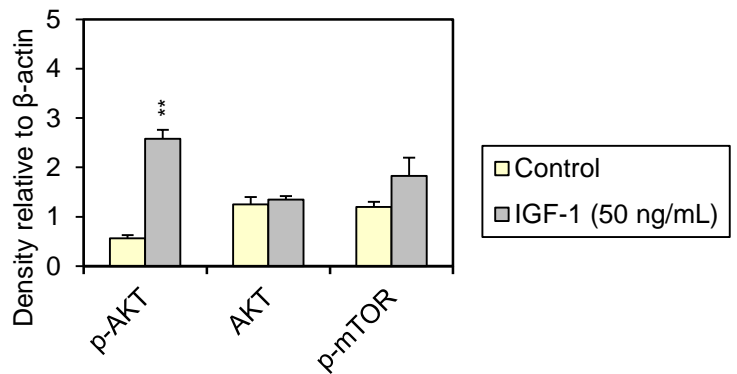

## A PC-3-Control

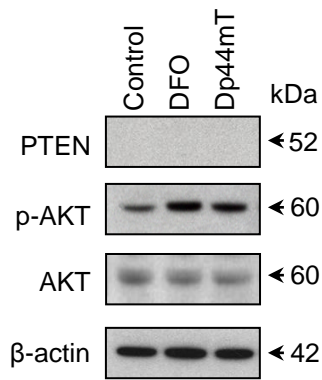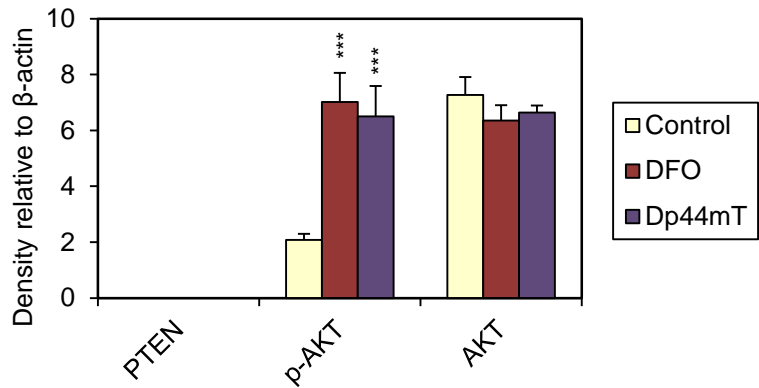

## B PC-3-PTEN

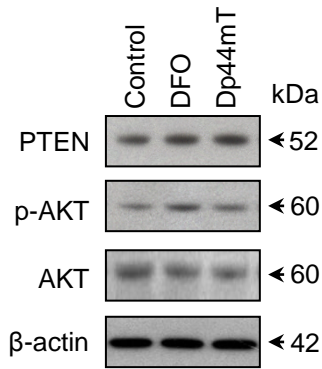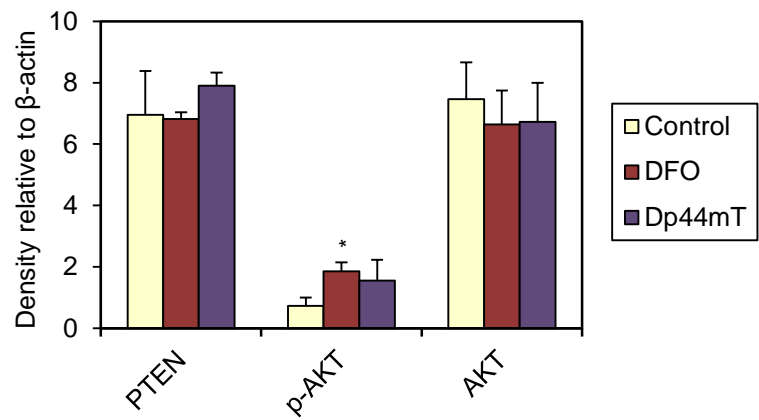

Supplementary Figure 5

# A PC-3 +NDRG1

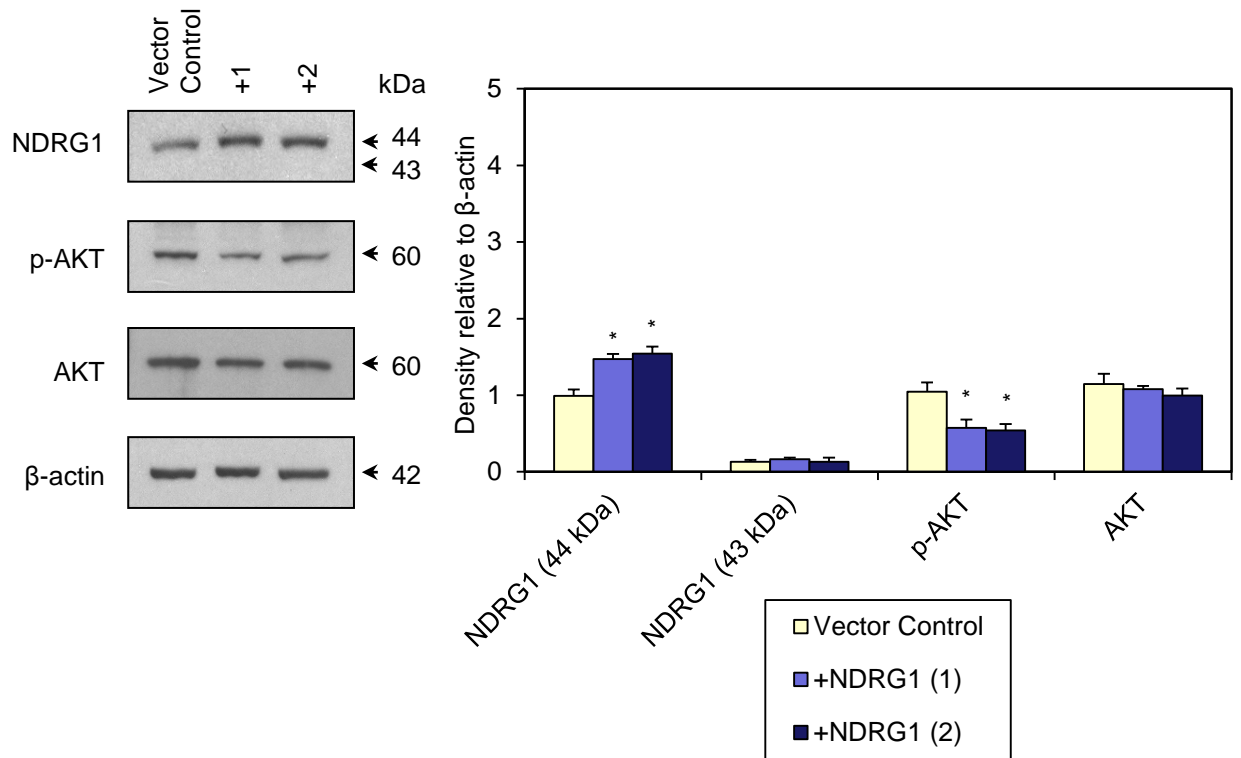

Supplementary Figure 6
